# Supplementary material
Source: HighWire-hosted journal article supplement (https://svn.smart01.highwire.org/content/svn-2024-003535)
Supplement: inline-supplementary-material-1 [file inline-supplementary-material-1.pdf]

**Table 1** Demographic characteristics, symptoms, and onset-to-door time for patients with acute ischemic stroke

|                                                                               | Overall       | Male        | Female      | P-value |
|-------------------------------------------------------------------------------|---------------|-------------|-------------|---------|
| Number of patients                                                            | 12,167        | 7973 (65.6) | 4190 (34.4) | <0.001  |
| Age (years)                                                                   | 66.06±11.79   | 64.33±11.65 | 69.34±11.35 | <0.001  |
| Educational level                                                             |               |             |             | <0.001  |
| College level and higher                                                      | 378 (3.1)     | 312 (3.9)   | 66 (1.6)    |         |
| Vocational school/high school                                                 | 2438 (20.0)   | 1829 (22.9) | 609 (14.5)  |         |
| Middle school/elementary school                                               | 8423 (69.2)   | 5451 (68.4) | 2968 (70.8) |         |
| Illiterate                                                                    | 929 (7.6)     | 382 (4.8)   | 547 (13.1)  |         |
| Living with others at the time of illness onset (%)                           | 11,541 (94.8) | 7588 (95.2) | 3950 (94.3) | 0.039   |
| Patients or family members aware of SEM (%)                                   | 2732 (22.5)   | 1784 (22.4) | 945 (22.6)  | 0.838   |
| Patients or family members have previously browsed the WeChat page on SEM (%) | 2546 (20.9)   | 1674 (21.0) | 869 (20.7)  | 0.762   |
| Distance from onset location and first-visit hospital ≤20 km (%)              | 9344 (76.8)   | 6148 (77.1) | 3193 (76.2) | 0.286   |
| The form of transportation to the hospital                                    |               |             |             | 0.454   |
| Self-transported to the hospital (%)                                          | 10981 (90.2)  | 7196 (90.2) | 3782 (90.3) |         |
| EMS (%)                                                                       | 890 (7.3)     | 573 (7.2)   | 317 (7.6)   |         |
| Other forms                                                                   | 297 (2.4)     | 205 (2.6)   | 91 (2.2)    |         |
| Being transferred between hospitals (%)                                       | 1202 (9.9)    | 814 (10.2)  | 388 (9.3)   | 0.102   |
| First-visit department in the hospital                                        |               |             |             | 0.002   |
| Neurology emergency (%)                                                       | 5298 (43.5)   | 3483 (43.7) | 1814 (43.3) |         |

|                                                                                         |               |               |               |        |
|-----------------------------------------------------------------------------------------|---------------|---------------|---------------|--------|
| General emergency (%)                                                                   | 4542 (37.3)   | 3045 (38.2)   | 1495 (35.7)   |        |
| Neurology outpatient (%)                                                                | 2214 (18.2)   | 1375 (17.2)   | 838 (20.0)    |        |
| Neurosurgery outpatient (%)                                                             | 13 (0.1)      | 8 (0.1)       | 5 (0.1)       |        |
| Other (%)                                                                               | 101 (0.8)     | 63 (0.8)      | 38 (0.9)      |        |
| Wake-up stroke (%)                                                                      | 1295 (10.6)   | 880 (11.0)    | 414 (9.9)     | 0.053  |
| Pre-onset mRS score                                                                     | 0.31±0.81     | 0.29±0.78     | 0.34±0.87     | 0.001  |
| mRS score within 24 hours of admission                                                  | 2.17±1.52     | 2.10±1.49     | 2.30±1.58     | <0.001 |
| NIHSS score after onset                                                                 | 4.80±5.62     | 4.56±5.31     | 5.26±6.14     | <0.001 |
| Received IVT (%)                                                                        | 2080 (17.1)   | 1419 (17.8)   | 659 (15.7)    | 0.004  |
| DNT (min)                                                                               | 41.58±29.06   | 40.82±27.25   | 43.29±32.59   | 0.071  |
| Received intravascular thrombolysis or thrombectomy (%)                                 | 743 (6.1)     | 508 (6.4)     | 235 (5.6)     | 0.104  |
| DPT (min)                                                                               | 141.61±208.97 | 150.85±232.16 | 121.66±145.43 | 0.077  |
| Successful reperfusion achieved during interventional therapy (mTICI grade 2b or 3) (%) | 607 (89.7)    | 417 (89.7)    | 190 (89.6)    | 1      |
| AIS classification in TOAST                                                             |               |               |               | <0.001 |
| Large-artery atherosclerosis (%)                                                        | 5721 (47.0)   | 3770 (47.3)   | 1948 (46.5)   |        |
| Cardiogenic embolism (%)                                                                | 740 (6.1)     | 379 (4.8)     | 361 (8.6)     |        |
| Small-artery occlusion (%)                                                              | 4684 (38.5)   | 3151 (39.5)   | 1532 (36.6)   |        |
| Stroke of other determined etiology (%)                                                 | 731 (6.0)     | 482 (6.0)     | 249 (5.9)     |        |
| Stroke of undetermined etiology (%)                                                     | 292 (2.4)     | 192 (2.4)     | 100 (2.4)     |        |
| Discharge status                                                                        |               |               |               | 0.625  |

|                                                        |                |                |                |        |
|--------------------------------------------------------|----------------|----------------|----------------|--------|
| Death (%)                                              | 42 (0.3)       | 25 (0.3)       | 17 (0.4)       |        |
| Self-discharged (%)                                    | 11,919 (98.0)  | 7817 (98.0)    | 4098 (97.8)    |        |
| Transfer to the rehabilitation medicine department (%) | 205 (1.7)      | 131 (1.6)      | 74 (1.8)       |        |
| NIHSS score at discharge                               | 2.00 [4.00–0]  | 1.00 [4.00–0]  | 2.00 [4.00–0]  | <0.001 |
| Urban scale                                            |                |                |                | 0.759  |
| Megacity (%)                                           | 613 (5.1)      | 411 (5.2)      | 202 (4.8)      |        |
| Super-large city (%)                                   | 4139 (34.2)    | 2702 (34.1)    | 1436 (34.4)    |        |
| Large city (%)                                         | 2834 (23.4)    | 1872 (23.6)    | 961 (23.1)     |        |
| Medium-sized city (%)                                  | 3546 (29.3)    | 2301 (29.0)    | 1243 (29.8)    |        |
| Small city (%)                                         | 968 (8.0)      | 641 (8.1)      | 327 (7.8)      |        |
| Dizziness/vertigo                                      | 1860 (15.3)    | 1179 (14.8)    | 681 (16.3)     | 0.035  |
| Limb weakness                                          | 8317 (68.3)    | 5556 (69.7)    | 2758 (65.8)    | <0.001 |
| Time of stroke onset                                   |                |                |                | 0.227  |
| 0:00–5:59 (%)                                          | 1378 (11.3)    | 900 (11.3)     | 477 (11.4)     |        |
| 6:00–11:59 (%)                                         | 4751 (39.0)    | 3065 (38.4)    | 1686 (40.2)    |        |
| 12:00–17:59 (%)                                        | 3656 (30.0)    | 2424 (30.4)    | 1231 (29.4)    |        |
| 18:00–23:59 (%)                                        | 2383 (19.6)    | 1585 (19.9)    | 796 (19.0)     |        |
| ODT ≤3 hours (%)                                       | 2566 (21.1)    | 1700 (21.3)    | 864 (20.6)     | 0.38   |
| ODT                                                    | 697 [1630–240] | 660 [1520–234] | 720 [2140–240] | 0.001  |
| Pre-onset mRS score                                    |                |                |                | 0.001  |
| 0–1 (%)                                                | 11,156 (91.7)  | 7350 (92.2)    | 3803 (90.8)    |        |
| 2–3 (%)                                                | 823 (6.8)      | 523 (6.6)      | 299 (7.1)      |        |

|                         |             |             |             |        |
|-------------------------|-------------|-------------|-------------|--------|
| 4–5 (%)                 | 189 (1.6)   | 101 (1.3)   | 88 (2.1)    |        |
| NIHSS score after onset |             |             |             | <0.001 |
| 0–4 (%)                 | 8080 (66.4) | 5402 (67.7) | 2674 (63.8) |        |
| 5–15 (%)                | 3331 (27.4) | 2154 (27.0) | 1177 (28.1) |        |
| 16–42 (%)               | 757 (6.2)   | 418 (5.2)   | 339 (8.1)   |        |

Values are presented as n (%), mean±standard deviation, or median [Q3–Q1].

SEM, stroke emergency maps; EMS, emergency medical service; NIHSS, National Institutes of Health Stroke Scale; IVT, intravenous thrombolysis; DNT, door-to-needle time; DPT, door-to-puncture time; mTICI, modified Thrombolysis in Cerebral Infarction; AIS, acute ischemic stroke; TOAST, Trial of Org 10172 in Acute Stroke Treatment; ODT, onset-to-door time; mRS, Modified Rankin Scale.
